# Supplementary material
Source: PubMed Central journal article supplement (PMC117415)
Supplement: pnas_99_2_972__11.pdf [file pnas_99_2_972__11.pdf]

Mock Bp LPS Bp338 BpMinn1 E. coli S. aureus-1 S. aureus-2 Iono+PMA

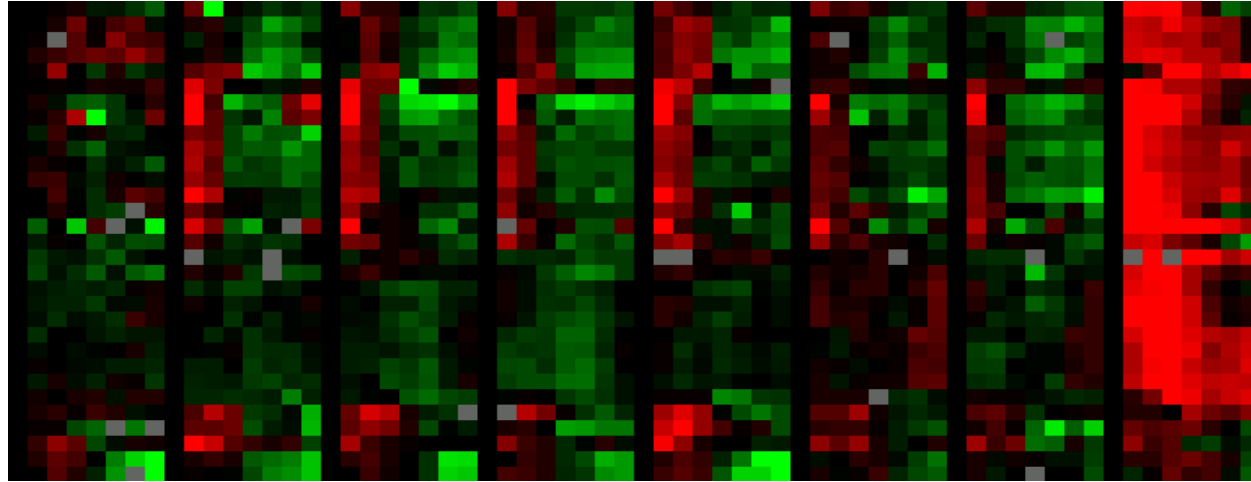

BTG2  
 Similar to sgk  
 sgk  
 c-jun  
 c-fos  
 c-fos  
 Unknown  
 Hs.123581 ESTs  
 BTG2  
 EGR-1=Early growth response protein 1  
 AREB6=zinc finger homeodomain protein  
 PrP=prion protein  
 Hs.158876 EST  
 Similar to MxB  
 SLAP=src-like adapter protein  
 SLAP=src-like adapter protein  
 LEC=liver CC chemokine-1  
 PDGF2=platelet-derived growth factor 2  
 Hs.69298 ESTs  
 Hs.69298 ESTs

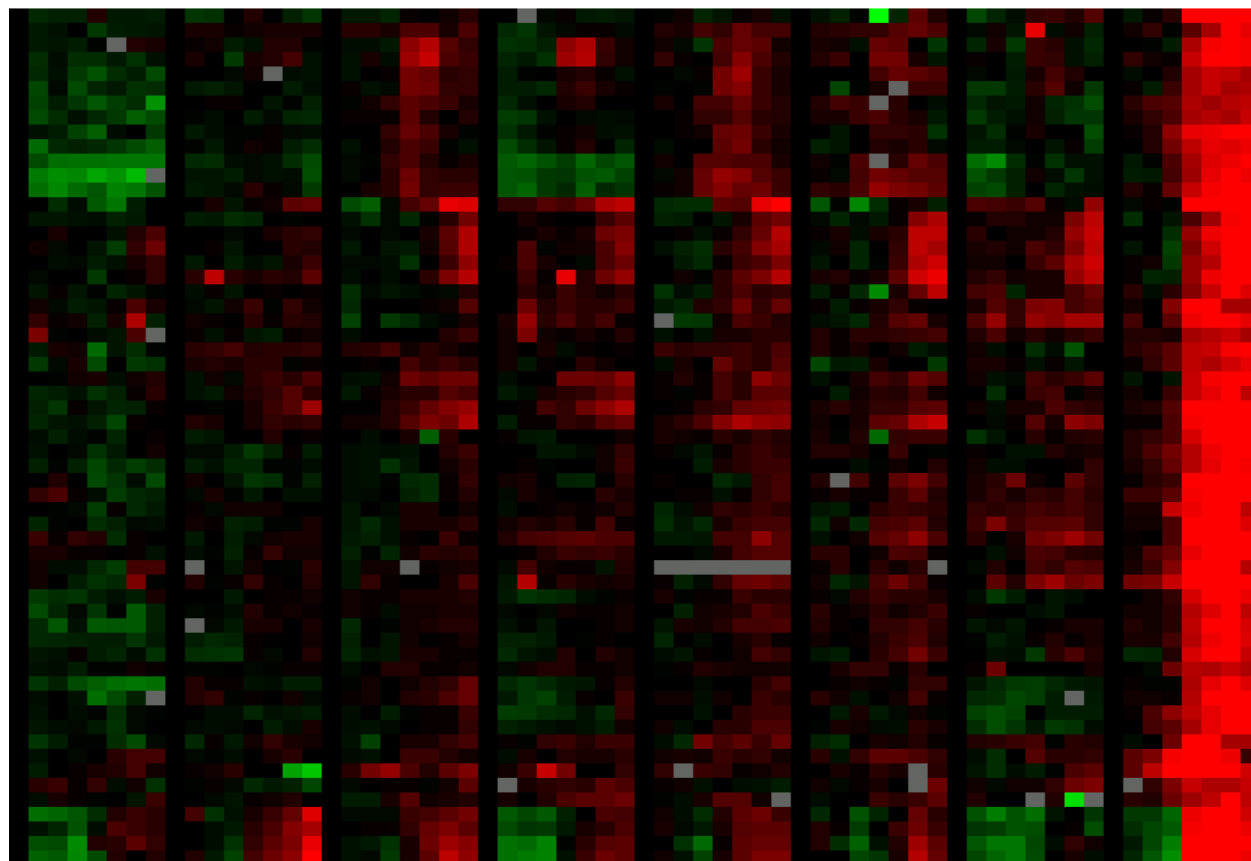

Signal recognition particle 72 (SRP72)  
 Thioredoxin reductase  
 Topoisomerase I  
 GADD45 alpha  
 KIAA0838=Similar to glutaminase  
 Cyclin D2  
 MMP-1  
 Serine hydroxymethyl transferase  
 Gfi-1  
 CTP synthetase  
 Similar to HEM45  
 cdk4  
 Glycyl tRNA synthetase  
 GRSF-1=cytoplasmic G-rich mRNA sequence binding factor  
 dystrobrevin B DTN-B2=dystrophin-associated protein A0  
 ornithine decarboxylase 1=odc1  
 CTP synthetase  
 RAN=GTP-binding nuclear protein  
 G1 to S phase transition 1  
 Protein synthesis factor (eIF-4C)  
 MAPKAP kinase (3pK)  
 Eukaryotic translation initiation factor 4E  
 phosphoglycerate mutase brain isoform (PGAM1)  
 Gfi-1=growth factor independence-1=zinc finger protein  
 methionine adenosyltransferase alpha subunit  
 uridine phosphorylase  
 HSP70-HOM=Heat shock 70 KD protein 1  
 HSP70
