# Supplementary material
Source: PubMed Central journal article supplement (PMC117415)

Untreated Bp338 Bp537 BpA2-6 BpTox6

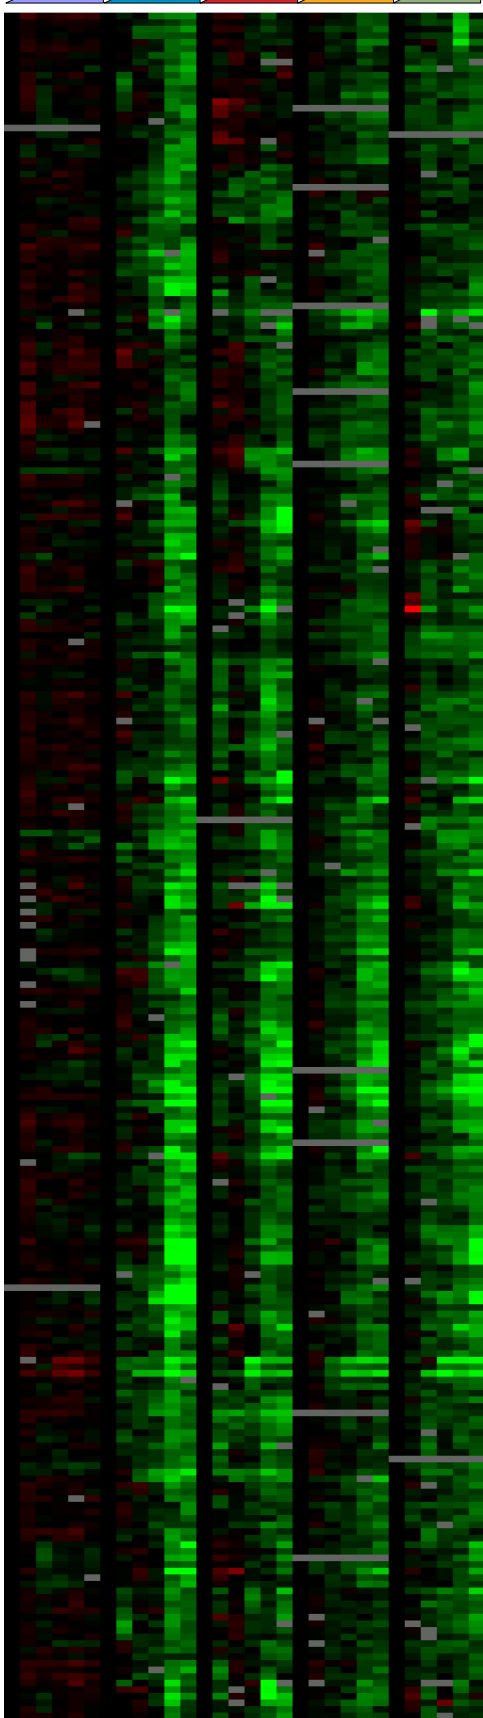

- STP1=phenol-preferring phenol sulfotransferase1
- P-selectin glycoprotein ligand
- **gamma-interferon inducible gene IP-30**
- HMG-2=high mobility group 2 protein
- Net=ELK3
- R-PTP-alpha=receptor protein tyrosine phosphatase alpha
- CD49C=Integrin alpha 3
- Arachidonate 5-lipoxygenase=5-lipoxygenase=5-LO
- MxB
- c-myc
- SIP-110=signaling inositol polyphosphate 5 phosphatase
- WIP/HS PRPL-2=WASP interacting protein
- CD49C=Integrin alpha 3
- PKC beta =Protein kinase C, beta
- Tis11d=ERF-2=growth factor early response gene
- ELF-1=ets family transcription factor
- SH3P18=SH3 domain-containing protein
- PCM-1=autoantigen pericentriol material 1
- pLK=homologue of Drosophila polo serine/threonine kinase
- **CD105=endoglin**
- Cytotoxic ligand TRAIL receptor
- CD103 alpha=Integrin alpha-E
- ATM
- GRK5=G protein-coupled receptor kinase 5
- **Glutathione peroxidase 1**
- IL-16
- CD62L=L-selectin=LAM-1
- c-myb
- **CD31=PECAM-1**
- CD33
- SLAP=src-like adapter protein
- CD11A=Integrin, alpha L=LFA-1 alpha chain
- Transforming growth factor, beta receptor
- PARP
- MDR1=Multidrug resistance-associated protein 1
- calcium/calmodulin-dependent protein kinase II
- **CD64**
- TTG-2
- **C-C chemokine receptor 1=CC CK1**
- HNPP=nuclear phosphoprotein
- MAPKAP kinase (3pK)
- **cytohesin-1**
- **CD115=CSF-1 receptor**
- thymosin beta-4
- **Myeloid cell nuclear differentiation antigen**
- Peroxisome assembly factor-2 (PAF-2)
- Peroxisome biogenesis disorder protein 1 (PEX1)

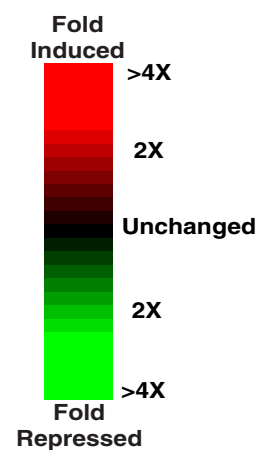

Supplement: pnas_99_2_972__12.pdf [file pnas_99_2_972__12.pdf]
