# Supplementary material
Source: PubMed Central journal article supplement (PMC117415)

Live vs. Killed  
Dataset

Dose Response Dataset

Diversity Dataset

Bp338 Live Killed Mock  
 Bp338 Dose 1X 10X 100X 1000X  
 S. aureus Dose 1X 10X 100X 1000X  
 Bp LPS Dose 0.01ug/ml 0.1ug/ml 1.0ug/ml Mock  
 Bp LPS Bp338 BpMinn1 E. coli(1) S. aureus(1) S. aureus(2) Iono+PMA E. coli(2)

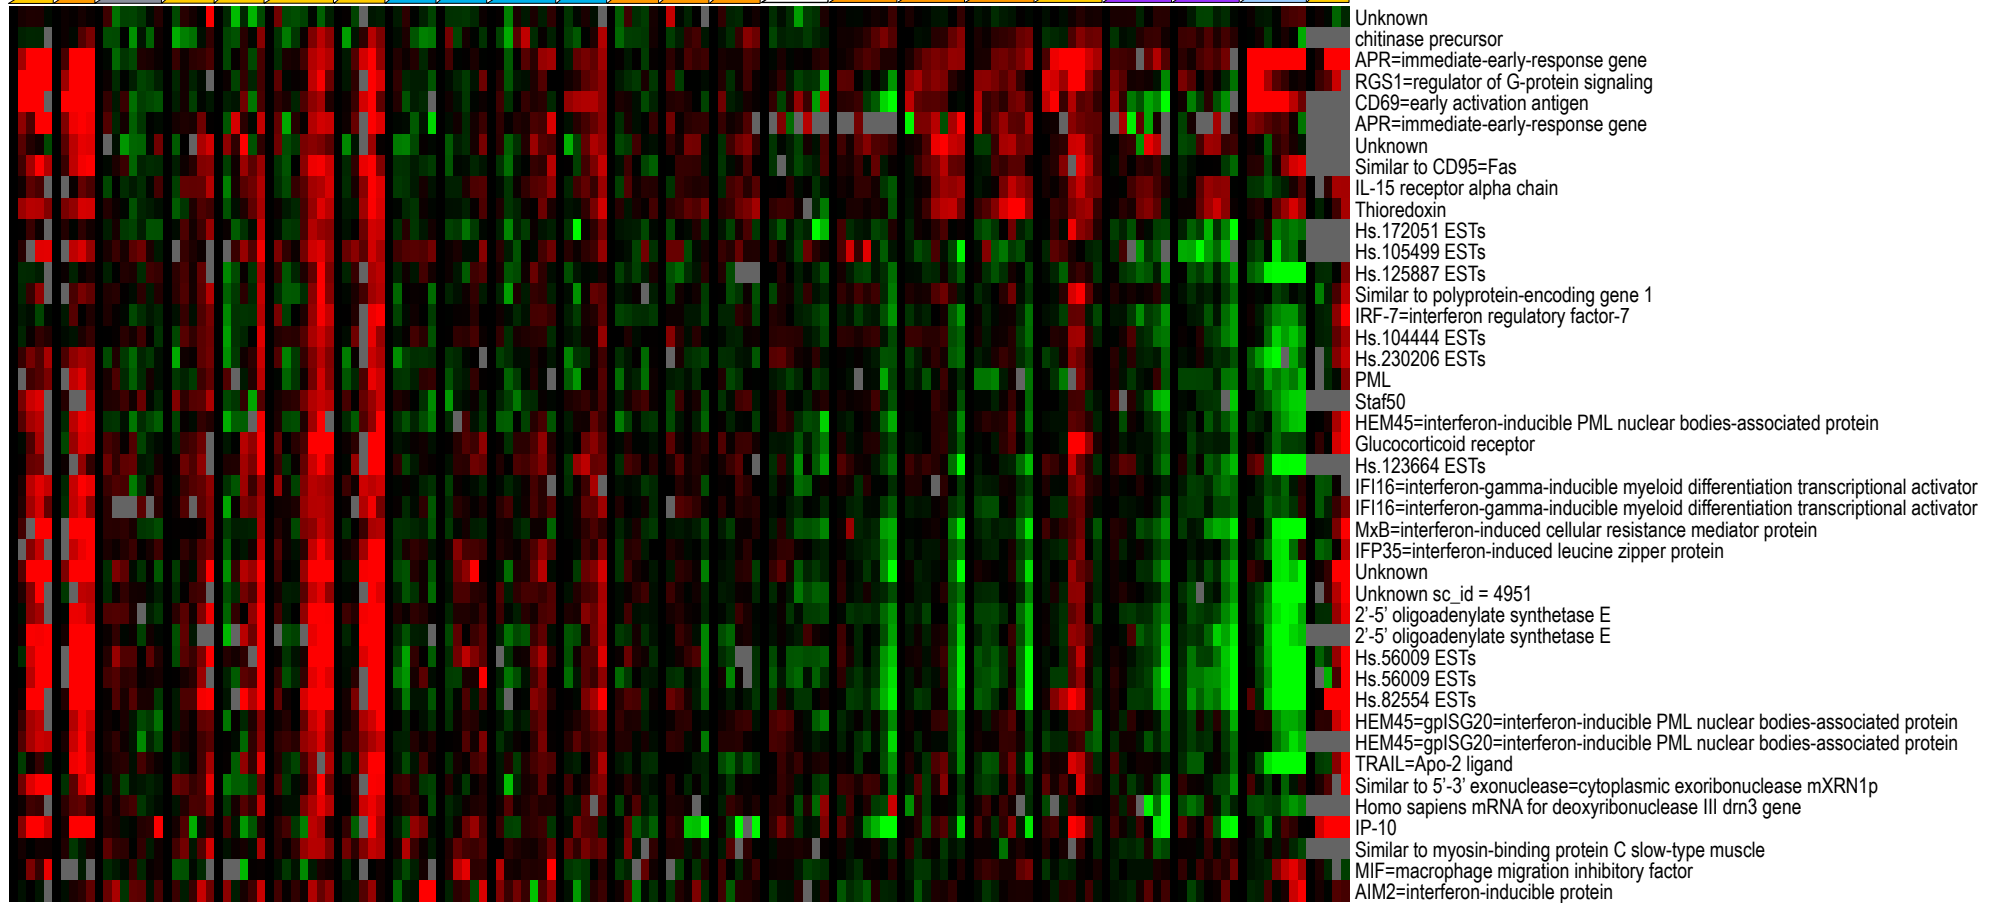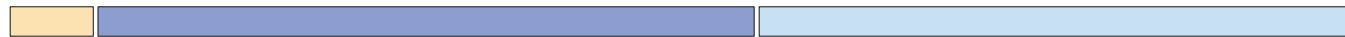

Supplement: pnas_99_2_972__15.pdf [file pnas_99_2_972__15.pdf]
