# Supplementary material
Source: PubMed Central journal article supplement (PMC117415)

**a**

## Common Induction

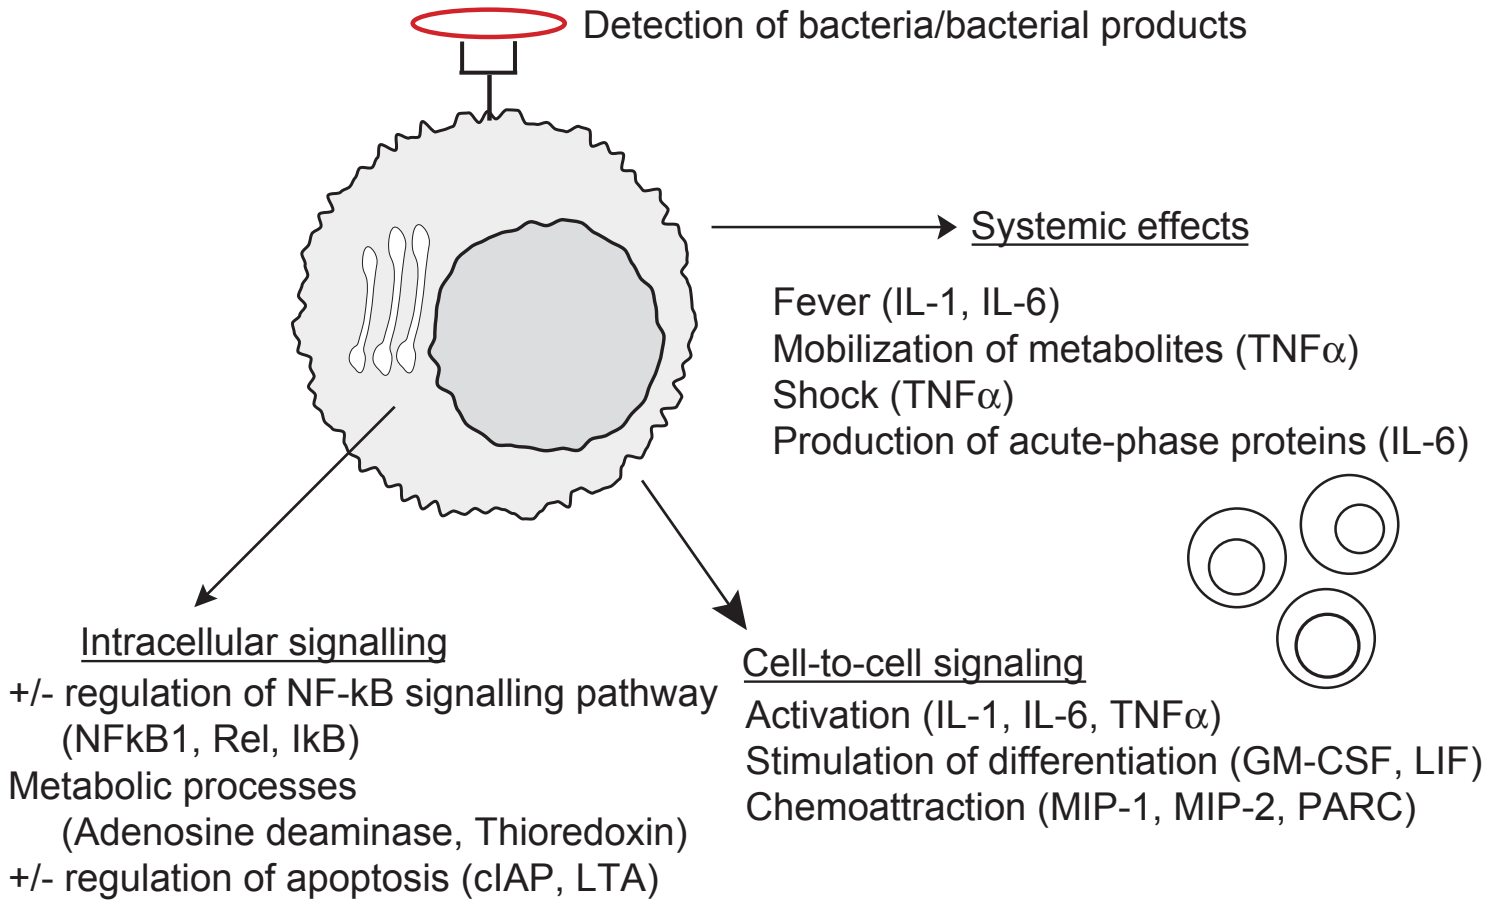

**b**

## Common Repression

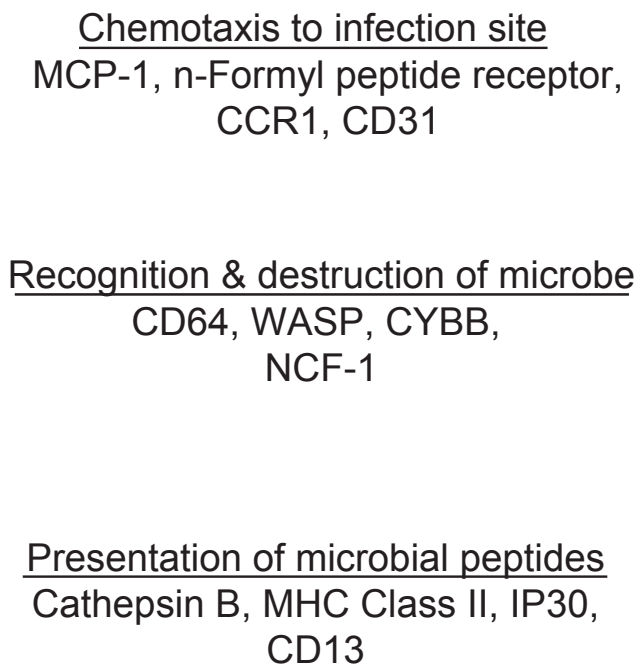

Supplement: pnas_99_2_972__13.pdf [file pnas_99_2_972__13.pdf]

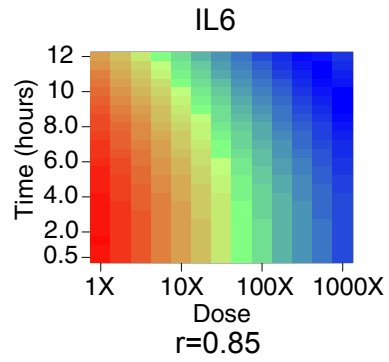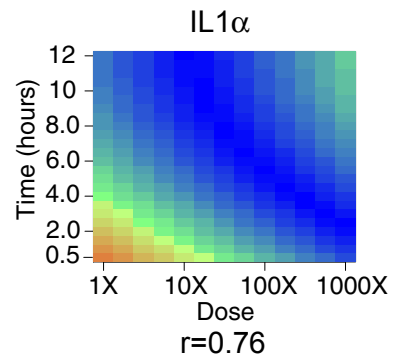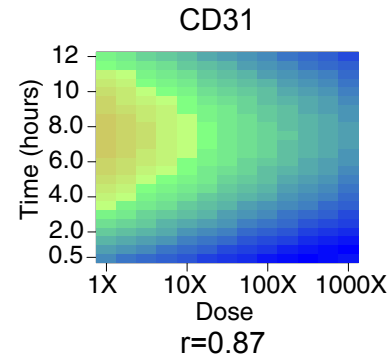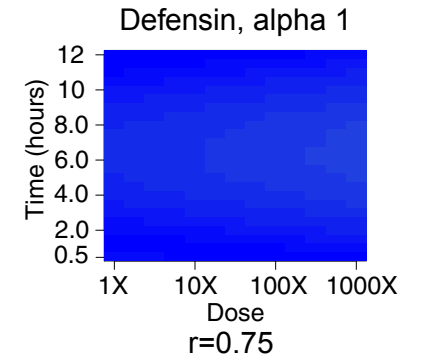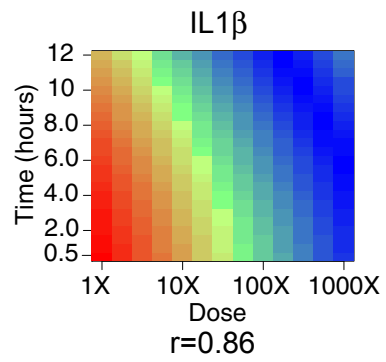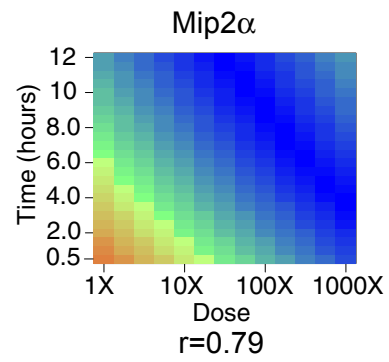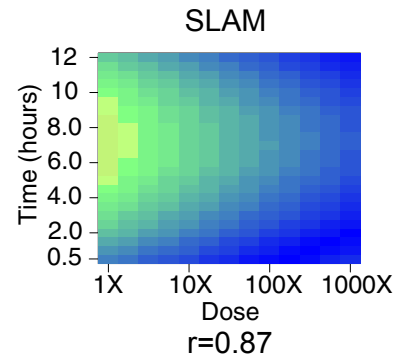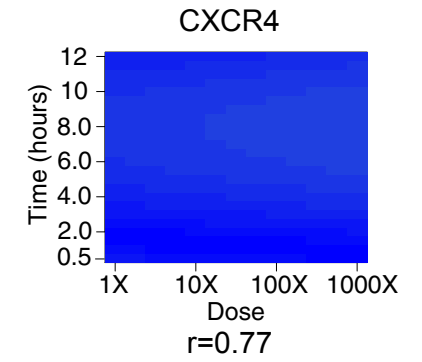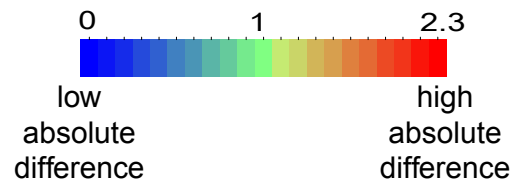

Supplement: pnas_99_2_972__14.pdf [file pnas_99_2_972__14.pdf]

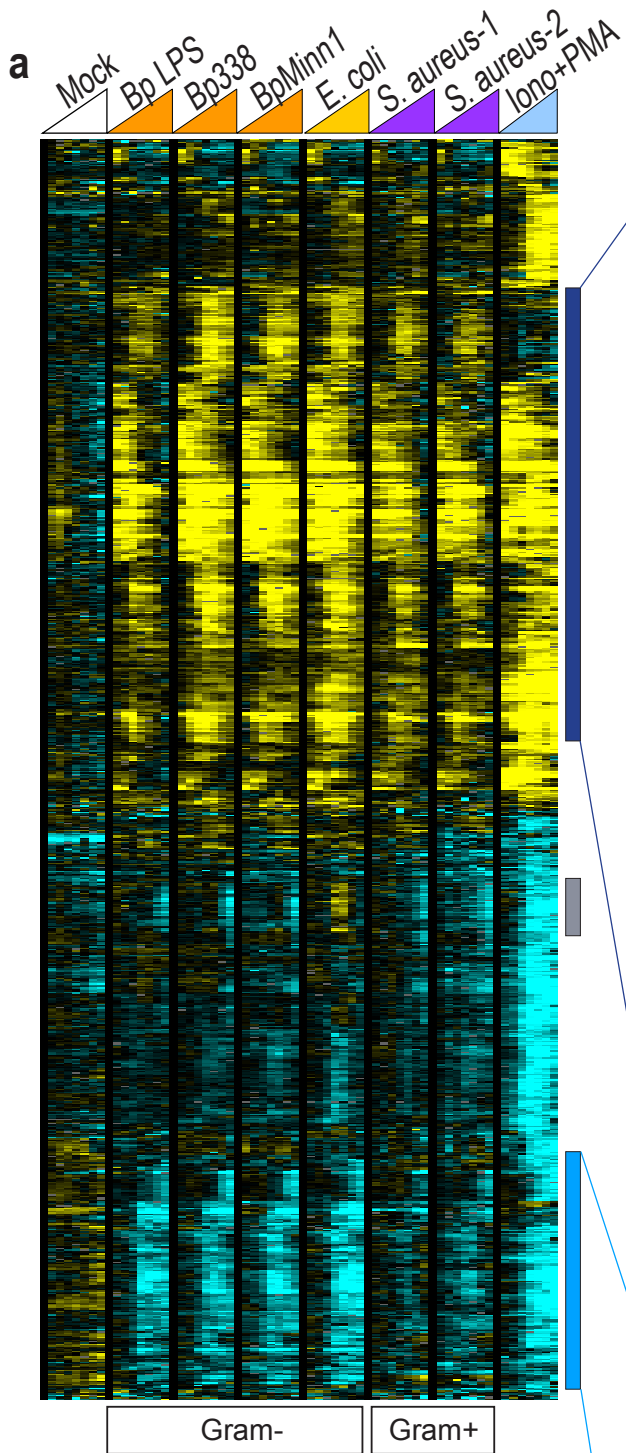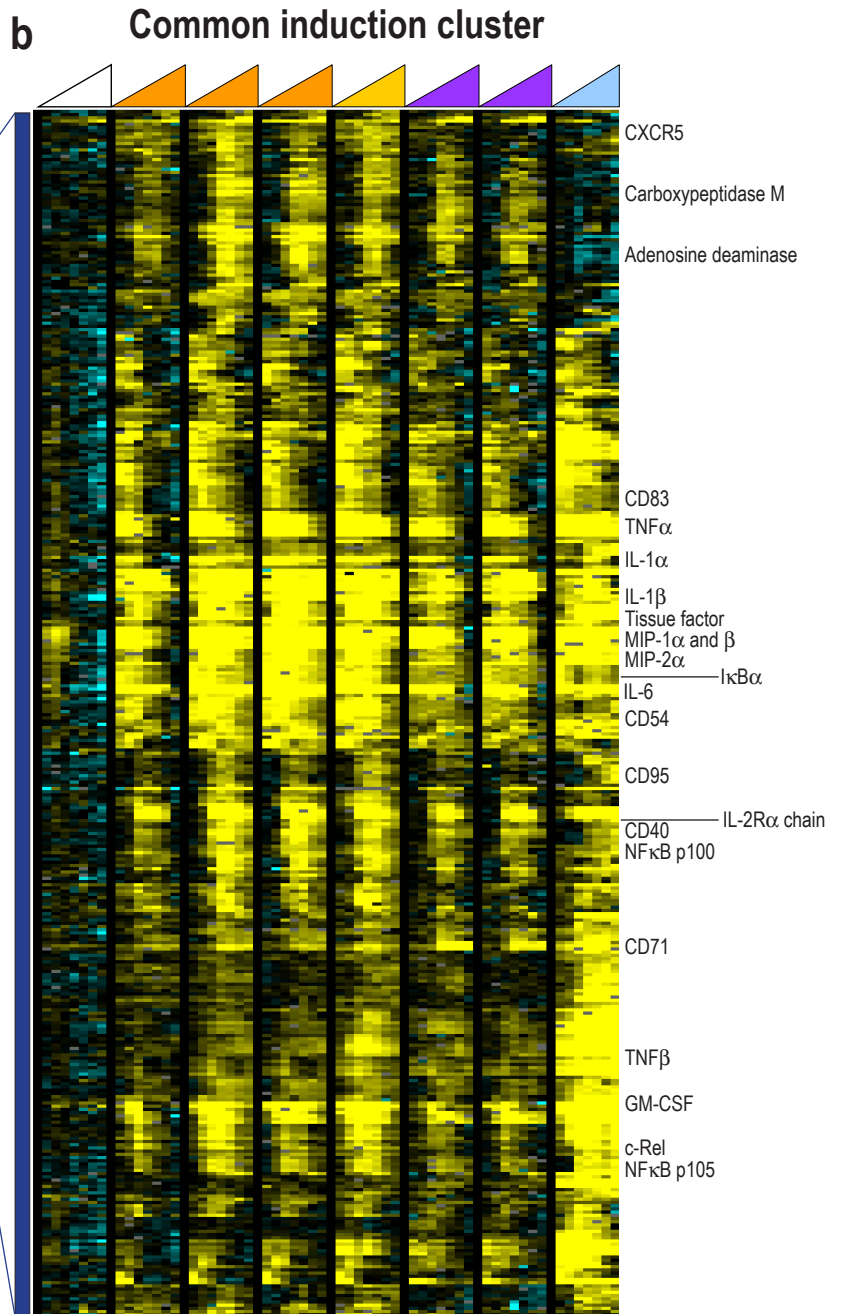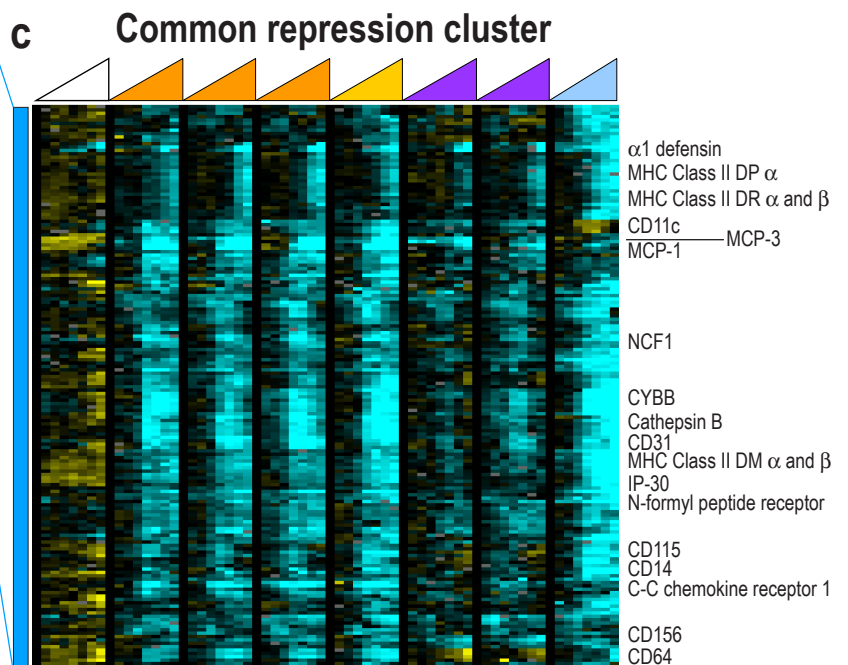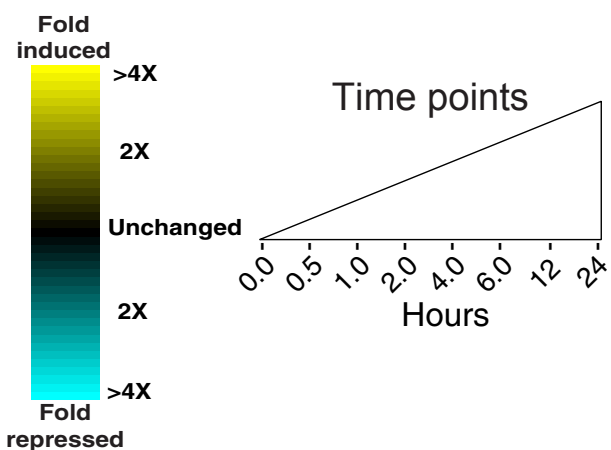

Supplement: pnas_99_2_972__16.pdf [file pnas_99_2_972__16.pdf]

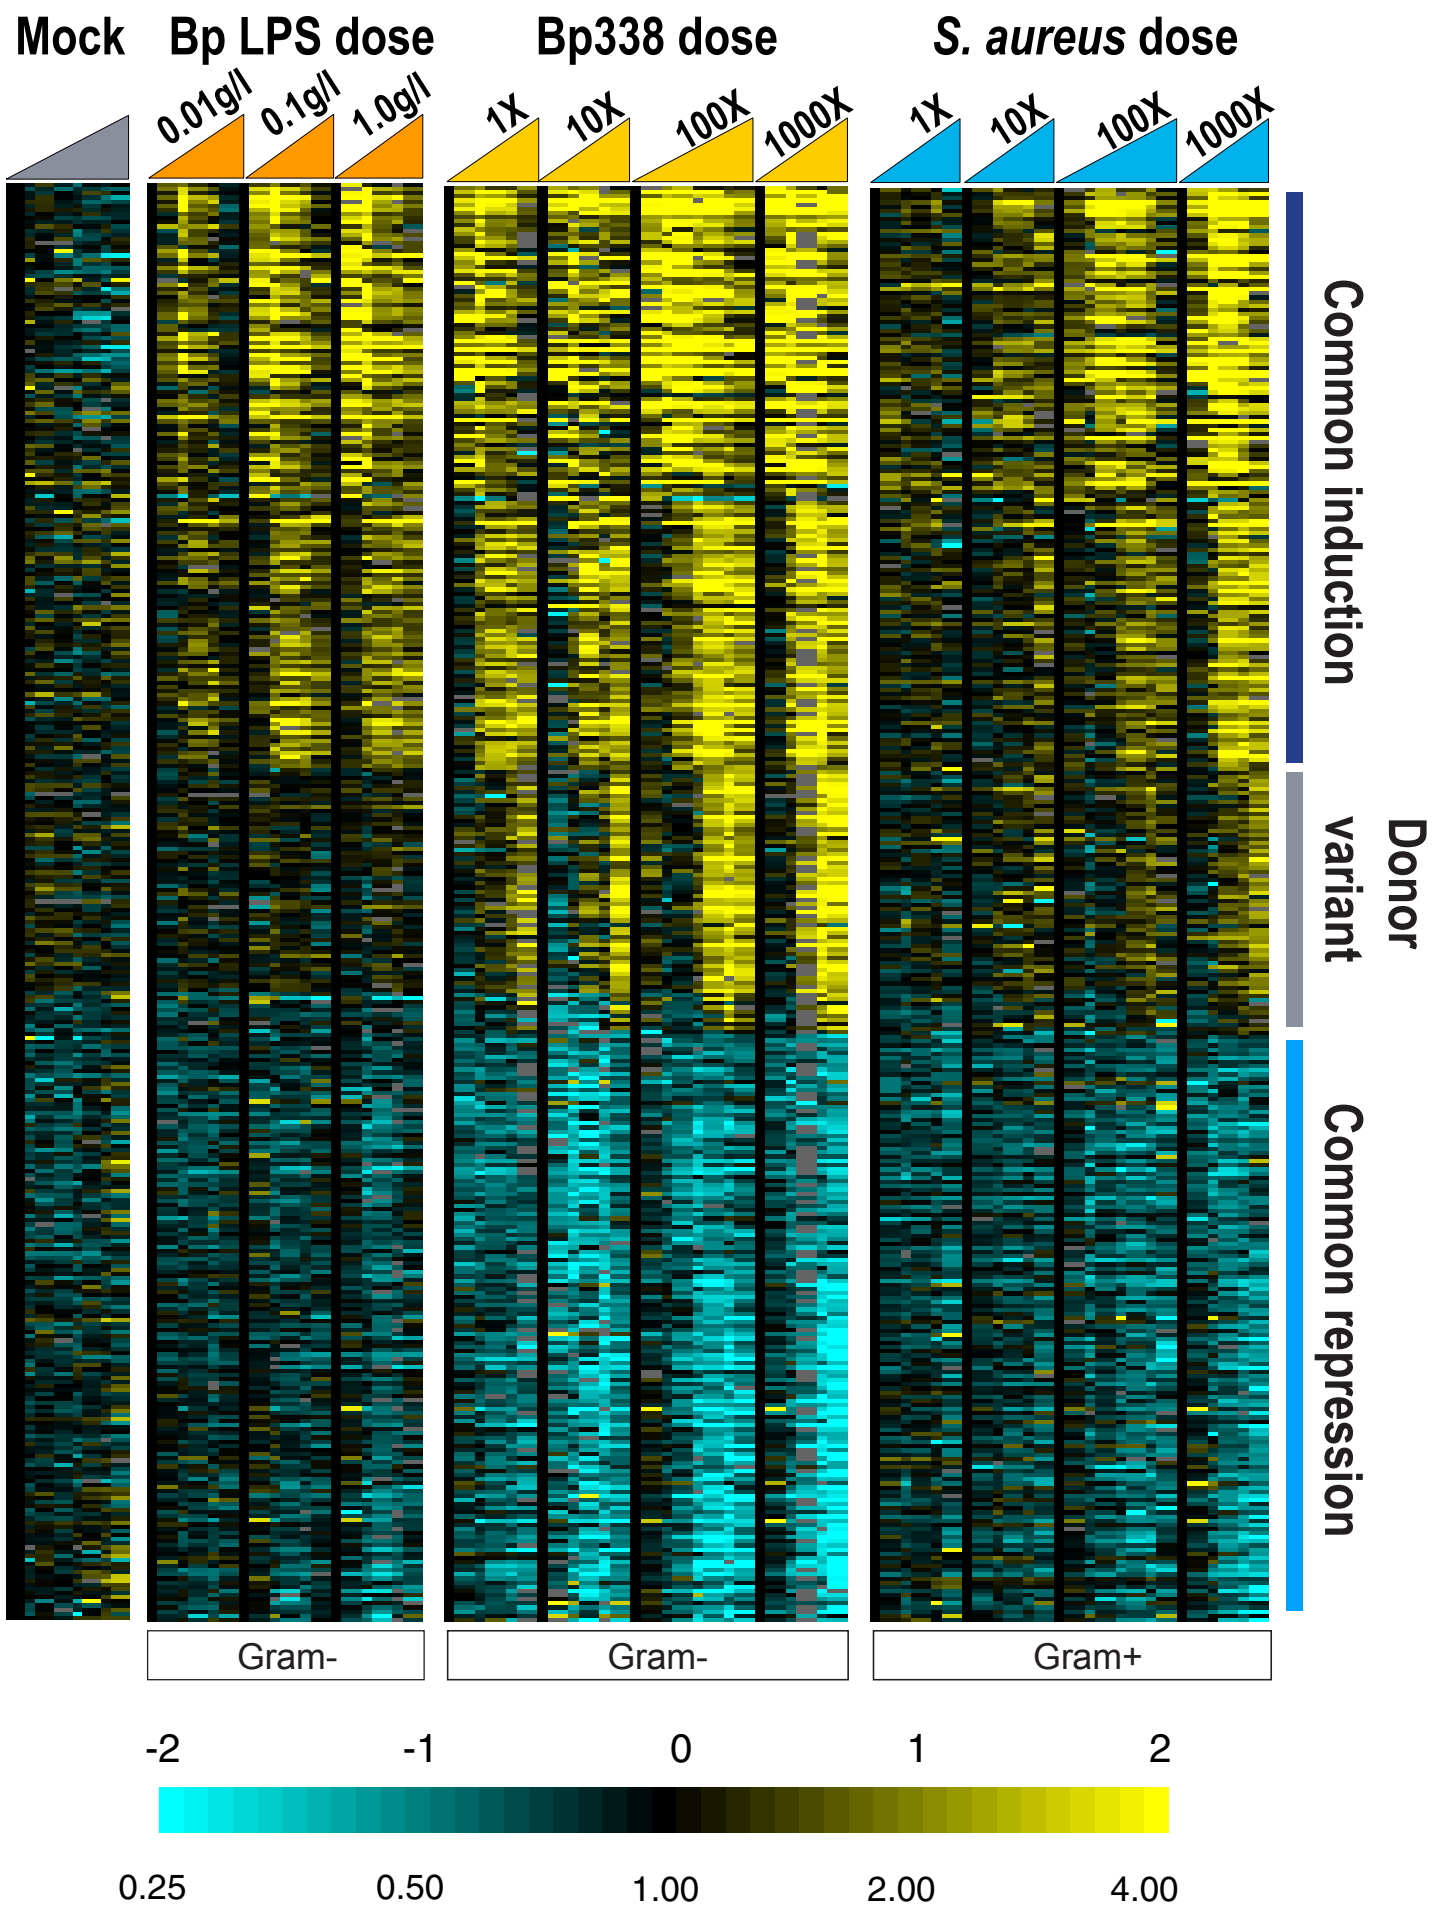

Supplement: pnas_99_2_972__17.pdf [file pnas_99_2_972__17.pdf]

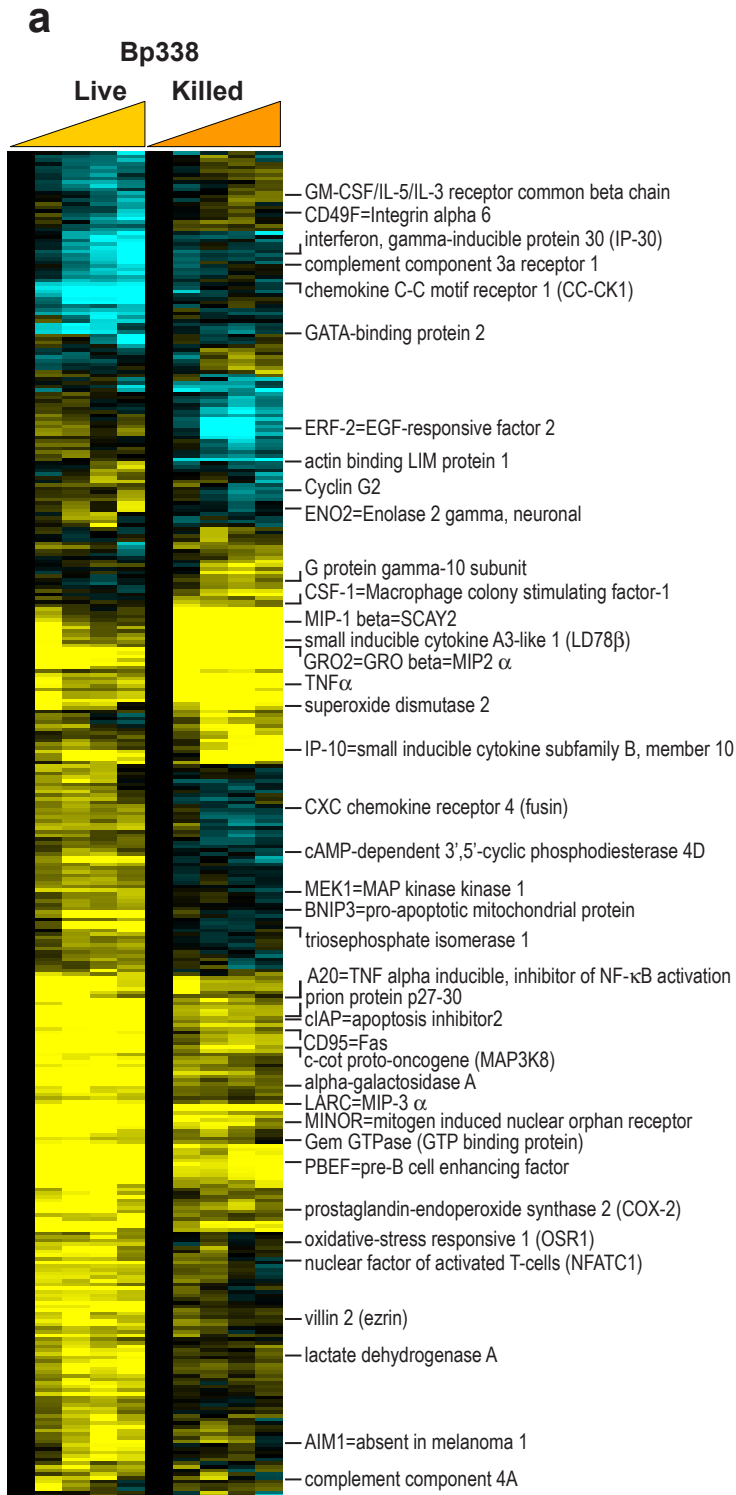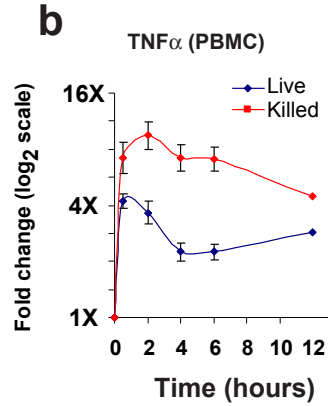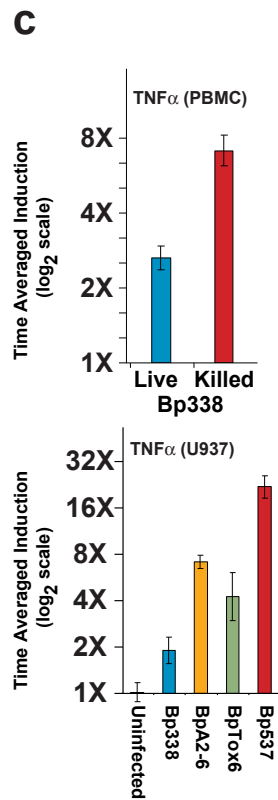

Supplement: pnas_99_2_972__18.pdf [file pnas_99_2_972__18.pdf]
